# Supplementary material for: Investigating the interaction of dye molecules with graphene oxide by using a surface plasmon resonance technique
Source: Royal Society of Chemistry journal article supplement (doi:10.1039/c4ra07279k), 2014-01-01
Supplement: c4ra07279k1.pdf [file c4ra07279k1.pdf]

## Supporting information

### Investigating the interaction of dye molecules with graphene oxide by using surface plasmon resonance technique

TianyuXue,<sup>a</sup> Zhao Wang,<sup>a</sup>WeimingGuan,<sup>b</sup>ChangminHou,<sup>c</sup> Zhan Shi,<sup>c</sup>WeitaoZheng<sup>a</sup> and Xiaoqiang Cui<sup>\*a</sup>

<sup>a</sup>Key Laboratory of Automobile Materials of MOE and State Key Laboratory of Superhard Materials, Department of Materials Science, Jilin University, Changchun 130012, People's Republic of China.

E-mail: xqcui@jlu.edu.cn (X.C.).

<sup>b</sup>State Key Laboratory of Advanced Technologies for Comprehensive Utilization of Platinum Metals, Kunming, 650106, People's Republic of China.

<sup>c</sup>State Key Laboratory of Inorganic Synthesis and Preparative Chemistry, College of Chemistry, Jilin University, Changchun, China

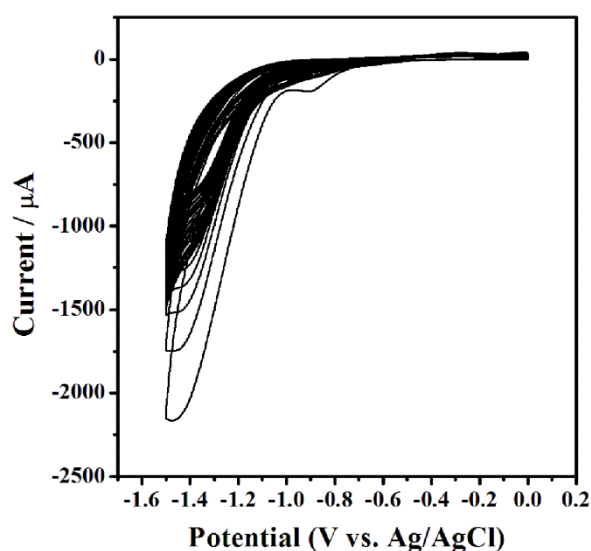

Figure S1. *In-situ* electrochemical reduction of GO on the Au surface by cyclic voltammetry in PBS (Ph 7.4) saturated with nitrogen gas at a scan rate of 50 mV/s.

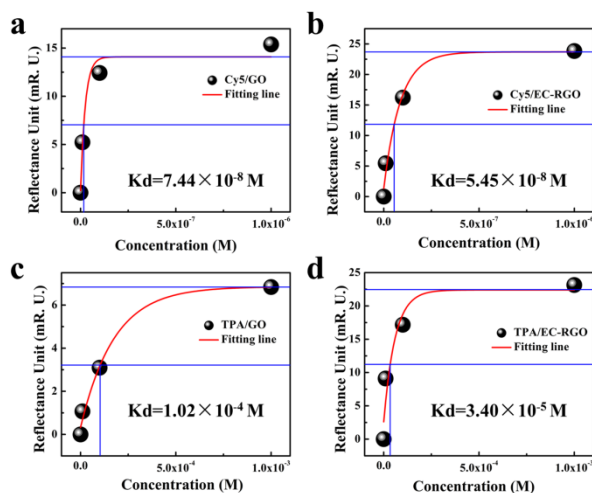

Figure S2. SPR response versus a series concentrations of Cy5 (a, b) and TPA (c, d) on the substrates of GO (a, c), and EC-rGO (b,d) substrates. The dissociation constants ( $K_d$ ) are obtained at the point of 1/2 of Maximal equivalent response of SPR. Each point corresponds to the SPR response shift for the concentration of TPA molecules.
